# Supplementary material
Source: PubMed Central journal article supplement (PMC298792)
Supplement: pnas_262672599_1.pdf [file pnas_262672599_1.pdf]

**Table 2. Unidentified *Medicago truncatula* proteins responsive to *N*-acyl homoserine lactones (AHLs) and proteins affected only by high (50  $\mu$ M) concentrations of 3-oxo-C<sub>12</sub>-HL**

| Putative identity                           | M. t. TC † | TOG §  | pI/MW (kDa) ¶ | C12**<br>50 $\mu$ M<br>block<br>24h | C12<br>2 $\mu$ M<br>block<br>24h | C12<br>100 nM<br>spray<br>24h | C12<br>10 nM‡‡<br>spray<br>24h | C16<br>10 nM§§<br>block<br>24h | C16<br>1 nM§§<br>spray<br>24h | C12<br>50 $\mu$ M<br>block<br>48 | C12<br>2 $\mu$ M<br>block<br>48h | C16<br>10 nM§§<br>spray<br>48h |
|---------------------------------------------|------------|--------|---------------|-------------------------------------|----------------------------------|-------------------------------|--------------------------------|--------------------------------|-------------------------------|----------------------------------|----------------------------------|--------------------------------|
| <b>Flavonoid metabolism*</b>                |            |        |               |                                     |                                  |                               |                                |                                |                               |                                  |                                  |                                |
| Chalcone isomerase                          | TC45048    | 131607 | 5.2 / 25      | 190‡‡                               | 120                              | 60                            | 110                            | 150                            | 140                           | 90                               | 80                               | 80                             |
| <b>Various metabolic functions</b>          |            |        |               |                                     |                                  |                               |                                |                                |                               |                                  |                                  |                                |
| Glyceraldehyde-3-phosphate dehydrogenase    | TC43151    | 126306 | 6.4 / 26      | 190                                 | 90                               | 30                            | 80                             | 120                            | 60                            | 120                              | 110                              | 100                            |
| Glyceraldehyde-3-phosphate dehydrogenase    | TC43151    | 126306 | 5.9 / 27      | 220                                 | 90                               | 70                            | 90                             | 130                            | 100                           | 160                              | 130                              | 150                            |
| Malate dehydrogenase, cytosolic             | TC43296    | 139607 | 6.2 / 40      | 160                                 | 60                               | 30                            | 50                             | 120                            | 60                            | 240                              | 190                              | 90                             |
| Malate dehydrogenase, cytosolic             | TC43296    | 139607 | 6.2 / 41      | 210                                 | 100                              | 50                            | 90                             | 60                             | 140                           | 290                              | 200                              | 40                             |
| Malate dehydrogenase, cytosolic             | TC43296    | 139607 | 6.5 / 40      | 180                                 | 60                               | 30                            | 90                             | 140                            | 130                           | 440                              | 100                              | 70                             |
| 12-oxophytodienoate reductase               | TC43618    | n/a    | 6.2 / 26      | 250                                 | 50                               | 30                            | 70                             | 70                             | 20                            | 300                              | 170                              | 120                            |
| 23 kDa polypeptide, oxygen evolving complex | TC43209    | 128629 | 5.3 / 23      | 310                                 | 60                               | 70                            | 50                             | 130                            | 130                           | 30                               | 70                               | 70                             |
| <b>Unidentified proteins</b>                |            |        |               |                                     |                                  |                               |                                |                                |                               |                                  |                                  |                                |
| Mta16 ‡                                     |            |        | 6.6 / 12      | 30                                  | 64                               | 40                            | 140                            | 90                             | 40                            | 320                              | 30                               | 230                            |
| Mt110                                       |            |        | 4.8 / 41      | 90                                  | 50                               | 20                            | 40                             | 100                            | 60                            | 110                              | 110                              | 150                            |
| Mt136                                       |            |        | 5.8 / 18      | 30                                  | 30                               | 20                            | 120                            | 60                             | 70                            | 40                               | 100                              | 120                            |
| Mt13a                                       |            |        | 5.5 / 43      | 170                                 | 380                              | 80                            | 50                             | 60                             | 190                           | 190                              | 320                              | 170                            |
| Mt142                                       |            |        | 6.3 / 29      | 80                                  | 40                               | 30                            | 50                             | 90                             | 60                            | 80                               | 90                               | 100                            |
| Mt149                                       |            |        | 7.0 / 39      | 300                                 | 120                              | 160                           | 400                            | 230                            | 0                             | 550                              | 80                               | 410                            |
| Mt182                                       |            |        | 5.6 / 23      | 340                                 | 290                              | 100                           | 80                             | 120                            | 360                           | 220                              | 110                              | 120                            |
| Mt195                                       |            |        | 4.5 / 13      | 80                                  | 30                               | 40                            | 60                             | 150                            | 50                            | 50                               | 70                               | 30                             |
| Mt20                                        |            |        | 5.1 / 43      | 160                                 | 80                               | 60                            | 60                             | 140                            | 90                            | 140                              | 130                              | 60                             |
| Mt215                                       |            |        | 5.0 / 26      | 10                                  | 150                              | 10                            | 4                              | 40                             | 10                            | 360                              | 190                              | 360                            |
| Mt217                                       |            |        | 5.1 / 30      | 240                                 | 70                               | 100                           | 80                             | 150                            | 110                           | 160                              | 100                              | 40                             |
| Mt23                                        |            |        | 5.3 / 48      | 230                                 | 0                                | 30                            | 210                            | 6                              | 0                             | new                              | new                              | 0                              |
| Mt24                                        |            |        | 5.4 / 50      | 210                                 | 90                               | 70                            | 70                             | 120                            | 130                           | 40                               | 100                              | 50                             |
| Mt248                                       |            |        | 6.3 / 25      | 80                                  | 30                               | 10                            | 40                             | 90                             | 20                            | 40                               | 90                               | 140                            |
| Mt250                                       |            |        | 6.6 / 38      | 40                                  | 20                               | 7                             | 50                             | 40                             | 1                             | 1700                             | 210                              | 300                            |
| Mt266                                       |            |        | 4.8 / 22      | 110                                 | 20                               | 8                             | 20                             | 100                            | 30                            | 20                               | 50                               | 0                              |
| Mt272                                       |            |        | 5.4 / 16      | 220                                 | 100                              | 60                            | 90                             | 150                            | 230                           | 70                               | 80                               | 80                             |
| Mt312                                       |            |        | 4.6 / 29      | 140                                 | 210                              | 140                           | 90                             | 140                            | 280                           | 410                              | 110                              | 100                            |
| Mt317                                       |            |        | 4.5 / 35      | 0                                   | 0                                | 0                             | 0                              | new                            | 0                             | 0                                | 0                                | 0                              |
| Mt331                                       |            |        | 4.5 / 52      | 0                                   | 240                              | 270                           | 0                              | 860                            | 0                             | new                              | 0                                | 0                              |
| Mt333                                       |            |        | 4.6 / 52      | 0                                   | 180                              | 260                           | 330                            | 520                            | 350                           | new                              | new                              | 0                              |
| Mt336                                       |            |        | 4.75 / 54     | 130                                 | 0                                | 10                            | 90                             | 80                             | 10                            | 0                                | 50                               | 30                             |
| Mt348                                       |            |        | 5.25 / 58     | 80                                  | 20                               | 20                            | 50                             | 80                             | 20                            | 120                              | 120                              | 90                             |
| Mt351                                       |            |        | 5.0 / 31      | 180                                 | 60                               | 80                            | 50                             | 150                            | 70                            | 250                              | 210                              | 90                             |
| Mt371                                       |            |        | 5.3 / 26      | 360                                 | 340                              | 110                           | 220                            | 230                            | 1100                          | 140                              | 150                              | 140                            |
| Mt381                                       |            |        | 5.7 / 40      | 30                                  | 150                              | 30                            | 40                             | 280                            | 20                            | 20                               | 100                              | 40                             |
| Mt394                                       |            |        | 5.9 / 60      | 440                                 | 0                                | 0                             | 0                              | 40                             | 0                             | 0                                | 0                                | new                            |
| Mt412                                       |            |        | 6.75 / 28     | 340                                 | 360                              | 60                            | 240                            | 410                            | 160                           | 250                              | 50                               | 60                             |
| Mt416                                       |            |        | 6.6 / 22      | 6                                   | 100                              | 50                            | 230                            | 130                            | 80                            | 170                              | 30                               | 110                            |
| Mt423                                       |            |        | 6.25 / 12     | new                                 | new                              | new                           | new                            | new                            | new                           | 300                              | 0                                | 20                             |
| Mt447                                       |            |        | 5.8 / 35      | 150                                 | 50                               | 60                            | 50                             | 50                             | 10                            | 150                              | 120                              | 140                            |
| Mt452                                       |            |        | 6.4 / 33      | 60                                  | 70                               | 20                            | 40                             | 50                             | 40                            | 430                              | 100                              | 70                             |
| Mt53                                        |            |        | 5.6 / 27      | 50                                  | 30                               | 10                            | 30                             | 70                             | 30                            | 80                               | 70                               | 90                             |
| Mt64                                        |            |        | 5.0 / 26      | 110                                 | 120                              | 90                            | 130                            | 120                            | 170                           | 340                              | 130                              | 190                            |
| Mt65                                        |            |        | 5.0 / 25      | 120                                 | 170                              | 110                           | 140                            | 140                            | 220                           | 500                              | 140                              | 220                            |
| Mt665                                       |            |        | 4.3 / 38      | new                                 | new                              | new                           | new                            | new                            | new                           | new                              | 0                                | 0                              |
| Mt666                                       |            |        | 6.4 / 43      | 110                                 | 20                               | 10                            | 30                             | 70                             | 3                             | 150                              | 110                              | 190                            |
| Mt668                                       |            |        | 6.6 / 42      | 30                                  | 10                               | 10                            | 70                             | 90                             | 0                             | 360                              | 0                                | 100                            |
| Mt69                                        |            |        | 6.2 / 21      | 70                                  | 30                               | 30                            | 60                             | 120                            | 10                            | 40                               | 110                              | 80                             |
| Mt699                                       |            |        | 4.3 / 19      | 60                                  | 50                               | 30                            | 50                             | 100                            | 40                            | 110                              | 80                               | 50                             |
| Mt724                                       |            |        | 5.5 / 10      | 250                                 | 520                              | 250                           | 610                            | 250                            | 940                           | 90                               | 80                               | 90                             |
| Mt725                                       |            |        | 5.5 / 9.5     | 180                                 | 1400                             | 390                           | 2500                           | 390                            | 2800                          | 130                              | 20                               | 50                             |
| Mt751                                       |            |        | 4.1 / 50      | 100                                 | 130                              | 140                           | 180                            | 160                            | 210                           | 50                               | 264                              | 20                             |
| Mtx1                                        |            |        | 5.5 / 17      | 860                                 | 20                               | 70                            | 40                             | 480                            | 80                            | 80                               | 290                              | 410                            |

|        |          |     |     |     |     |     |      |     |     |     |
|--------|----------|-----|-----|-----|-----|-----|------|-----|-----|-----|
| Mtx1a  | 5.4 / 17 | 130 | 330 | 80  | 370 | 420 | 790  | 160 | 160 | 130 |
| Mtx2a  | 5.5 / 17 | 590 | 410 | 460 | 270 | 120 | 1100 | 110 | 60  | 150 |
| Mtxx10 | 5.6 / 10 | 0   | 0   | 0   | 0   | 0   | new  | 0   | 0   | 0   |

\*Proteins are grouped by putative function, recognizing that some functions may belong in more than one group.

†TCs = *M. truncatula* Tentative Clusters against which the proteins were matched by peptide mass fingerprinting. TCs can be accessed at <http://www.tigr.org/tdb/tgi/mtgi/>.

‡The unidentified proteins could not be matched to any TC in the *M. truncatula* database yet. Therefore, they are listed with a random identifier for internal reference.

§TOG indicates the Tentative Ortholog Group into which the *M. truncatula* TCs have been classified by The Institute for Genomic Research (TIGR), see <http://www.tigr.org/tdb/tgi/mtgi/>. N/a indicates that no TOG has been assigned to this TC.

¶The observed molecular weight (MW) and isoelectric point (pI) for each *M. truncatula* protein was determined from its position on the gels relative to known marker proteins.

\*\*C12 = 3-oxo-C<sub>12</sub>-HL; C16 = 3-oxo-C<sub>16:1</sub>-HL

††Relative accumulations are given in percent of the control level and are averages of results from three individual control gels and three individual treatment gels. Accumulation levels are also indicated by color code: yellow, a new protein not detected in controls; red, significantly increased; tan, nonsignificantly increased; pale green, nonsignificantly reduced; dark green, significantly reduced; blue, reduced below detection. *P* values for statistical significance of difference from control levels ranged from <0.001 to <0.05, but were <0.002 for over 90% of the proteins listed.

‡‡Only two gels were examined for proteins from roots exposed to the lowest concentration (10 nM) of 3-oxo-C<sub>12</sub>-HL.

§§Estimated concentration; see *Materials and Methods*.
